# Supplementary material
Source: MDPI journal article supplement (https://www.mdpi.com/2071-1050/14/8/4469)
Supplement: s1 [file s1]

# Leitfaden für qualitative Interviews:

## „Stabilität und Wandel von Pendelpraktiken“

Dauer: ca. 1 Stunde

### Überblick über den Verlauf

|                                                    | Dauer          |
|----------------------------------------------------|----------------|
| Teil 1: <b>Praktik des Pendelns vor Corona</b>     | Ca. 20 Minuten |
| Teil 2: <b>Praktik des Pendelns während Corona</b> | Ca. 15 Minuten |
| Teil 3: <b>Pendelbiografie</b>                     | Ca. 15 Minuten |
| Teil 4: <b>Alternativen</b>                        | Ca. 5 Minuten  |
| Teil 5: <b>Mobilität und Freizeit</b>              | Ca. 5 Minuten  |

### Ziele:

- Im ersten Schritt: Stabilität der Pendelwege und der Organisation des (täglichen) Pendelns verstehen (Faktoren, die die Routinen stabilisieren) - immer Gedacht als Netz von Praktiken einschl. gemachter Materialitäten
- Dann: Arten und Weisen der Nicht-Nachhaltigkeit des Pendelns explorieren
- Dann: Möglichkeiten und Potenziale der Veränderung der Pendel-Praktiken identifizieren

*Vor dem Interview: Einverständniserklärung vorlesen, ausfüllen und unter dem Interview-Kürzel abspeichern*

**Achtung! Aufnahme starten!**

## Teil 1: Praktik des Pendels vor Corona (20 min)

*In unserem Gespräch heute werden wir ausführlich darüber sprechen, **wie Sie Ihre Pendelwege machen und organisieren**. Wir wollen von Ihnen erfahren, **wie ihr Pendelweg genau aussieht** und was in Ihrem Alltag alles damit zusammenhängt.*

### Zum Einstieg

*Bitte erzählen Sie mir zunächst, wie ihre Pendelwege **vor Beginn der Corona-Pandemie** ausgesehen haben. Stellen Sie sich vor, dass ich bei Ihnen mitgefahren wäre und ich mich komplett nach Ihnen gerichtet habe: **Erzählen Sie so detailliert wie möglich**, worauf ich mich hätte einstellen müssen. Beginnen Sie am besten beim Aufstehen und fertig machen für den Tag.*

→ **Frei erzählen lassen**

→ **Ggf. nachfragen:**

- Was waren Aktivitäten vor dem Losgehen/fahren?
  - Frühstück, Kinder versorgen, Zeitung lesen, Podcast hören, Fertig machen, Tag planen, was wurde auf die Fahrt und für den Tag mitgenommen?
- Waren diese Abläufe immer gleich oder gab es von Tag zu Tag Unterschiede?
  - Falls Unterschiede: Worin bestanden die?

### Während des Hinwegs

*Können Sie mir jetzt möglichst genau von **Ihrem Pendelweg vor der Corona-Pandemie** erzählen? Erzählen Sie bitte ganz frei: **Wie kamen Sie zur Arbeit?***

→ **Frei erzählen lassen**

→ **Ggf. nachfragen:**

- Mit welchem **Verkehrsmittel**?
  - Benutzten Sie auch **andere Verkehrsmittel**?
  - Welche, wie oft, warum, nach welchen **Kriterien** (Jahreszeit, Wetter, Tagesablauf, etc.)
  - **Kombination** von Verkehrsmitteln? Welche? Warum?
- **Hauptverkehrsmittel**
  - **Gründe** für die Nutzung (mehrmals Nachhaken: Gab es noch andere Gründe?)
- Wo ist ihre **Arbeitsstelle/ Universität/ Berufsschule**?
  - Was machen Sie beruflich?
  - Evtl.: Wer ist ihr Arbeitsgeber?
- **Abfahrtszeit** immer gleich? Variation?
  - Wenn ja, wonach entschied sich das?
- **Variation im Weg**? Wenn ja: wovon war das abhängig?
- Direkt oder mit **Zwischenstationen**? Wenn ja, welche? Immer oder nur ab und zu?
  - Erledigten Sie auf dem Weg noch Dinge?

- Holten Sie vor der Fahrt Erkundigungen zur **Verkehrssituation** ein?
  - Wenn ja, wie? Hatte das einen Einfluss auf Abfahrtszeit?
- Wie lange dauerte der Pendelweg?
- **Häufigkeit** des Pendelns pro Woche?
- **Was machten Sie auf der Fahrt?**
  - Z.B. sich mit dem Handy beschäftigen, lesen, Musik hören, laut singen, gucken, schlafen, telefonieren, etc.?
  - Wie häufig? (immer, ab und zu)
  - Gab es Lieblingssender? Playlists?
- Fahrt alleine oder mit jemandem zusammen?
  - Wie häufig?
  - Warum?
  - Was war dann anders?

→ Ggf. nachfragen:

Wie weit ist Ihre Arbeitsstelle/die Universität/ Berufsschule **vom Wohnort entfernt?**

- Wie wohnen Sie: Städtisch / ländlich / Vorort
- Wohnen Sie in einem/einer: Ein-/Zweifamilienhaus, Mehrfamilienhaus, Wohnsiedlung, gemischtes Viertel, Ortskern o.ä.

→ **Nur an Autofahrer (Hauptverkehrsmittel)**

## Details zur Fahrt: Auto

Können Sie mir noch etwas genauer von Ihrer Fahrt mit dem Auto erzählen? **Wie lief eine Fahrt vor Corona typischer Weise ab?**

→ **Frei erzählen lassen**

→ Ggf. nachfragen:

- Wie lief eine **gute Fahrt** ab? Woran entschied sich das?
- Was konnte **schlecht laufen**? (Stau, Baustelle, Umleitungen, andere Autofahrer)
  - **Schwierige oder nervige Stellen** (schlechte Ampelschaltung, unübersichtliche Kreuzungen, schlechter Zustand der Infrastruktur, etc.)
- Wie informierten Sie sich über Ihre Wege (z.B. Stauinfos, Routenplaner, etc.)?
  - Änderten Sie Ihren Pendelweg, wenn Sie bestimmte, wichtige/neue Informationen erhalten haben? Wie?
- **Emotionale Reaktion** bei Störungen/Problemen (also Stau oder ähnliches): eher entspannt, eher genervt
  - Umgang mit **Störungen/Problemen** (alternative Strecken, Baustellen umfahren, warten)
- Wahrnehmung von **anderen Verkehrsteilnehmern**? Störende Verkehrsteilnehmer (Raser, Langsamfahrer, LKW, usw.)?
- **Fahrstil** (schnell, gemächlich, etc.)

- Veränderung am Fahrstil mit der Zeit (sicherer, schneller, aufmerksamer, unaufmerksamer)
- **Insgesamt, eher Spaß am Autofahren** zur Arbeit? Was machte dabei Spaß?
  - Oder insgesamt eher nervig? Was nervte vor Allem?
- Gibt es für Sie als Pendler mit dem Auto **ungeschriebene Regeln**, an die Sie sich halten bzw. von denen Sie möchten, dass andere sich auch daran halten?

→ **Nur an ÖV-Nutzer (Hauptverkehrsmittel)**

## Details zur Fahrt: ÖV (inkl. Weg zur Bahn/ zum Bus)

*Können Sie mir noch etwas genauer von Ihrer Fahrt mit der Bahn/U-Bahn/Straßenbahn/Bus erzählen? **Wie lief eine Fahrt vor Corona typischer Weise ab?** Fangen Sie am besten beim Weg zur Haltestelle/ zum Bahnhof an.*

→ **Frei erzählen lassen**

→ **Ggf. nachfragen:**

- Welche öffentlichen Verkehrsmittel nutzten Sie üblicherweise?
- Wie empfanden Sie den Weg zur Haltestelle/zum Bahnhof?
- Wie erlebten Sie die **Haltestelle/ den Bahnhof**?
  - (Beschreiben lassen: Angenehm/ unangenehm, sauber/ schmutzig, sicher/ unsicher?)
- Waren Sie eher **zu früh** an der Haltestelle oder **kamen Sie knapp an**?
  - Wenn zu früh, wie verbrachten Sie die **Wartezeit**?
- Was machte für Sie eine **gute Fahrt** aus? Woran entschied sich das?
- Was konnte **schlecht laufen**? (Verspätungen, Zugausfall, andere Mitfahrer, Gerüche, Dreck, unangenehme Sitze, zu viele Tunnel/Lärmschutzwände)
  - Wie gingen Sie damit um?
- Wie **informierten** Sie sich über Ihre Wege (z.B. Abfahrtszeiten, Fahrpreis)?
  - Änderten Sie Ihren Pendelweg, wenn Sie bestimmte, wichtige/neue Informationen erhielten? Wie?
- Wahrnehmung der **Atmosphäre im Zug/ Bus** (Lautstärke, Temperatur, Sauberkeit, Sicherheit)?
  - Gab es auch andere Situationen/ Stimmungen? Welche?
  - Wie nahmen Sie die **anderen Fahrgäste** wahr? Was störte ggf.?
- **Emotionale Reaktion** bei Störungen/Problemen: eher entspannt, eher genervt, weil...
- Aktivitäten bei **Störungen/Problemen**? (alternative Strecken, warten, DB-App checken...)
- Fuhren Sie insgesamt eher **gerne** mit dem ÖV zur Arbeit?
  - Falls ja: Was war das Angenehme daran?
- Oder war die Fahrt normalerweise eher **nervig**?
  - Falls ja, was nervte vor allem?
- Hat sich an ihrer Art, den ÖPNV zu nutzen etwas geändert, seit Sie damit pendeln?
- Gibt es für Sie als Pendler mit dem ÖV **ungeschriebene Regeln**, an die Sie sich halten bzw. von denen Sie möchten, dass andere sich auch daranhalten.

### → Nur an Fahrradfahrer (Hauptverkehrsmittel)

## Details zur Fahrt: Fahrrad

Können Sie mir noch etwas genauer von Ihrer Fahrt mit dem Fahrrad erzählen? **Wie würden Sie eine typische Fahrt vor Corona beschreiben?**

→ **Frei erzählen lassen**

### → Ggf. nachfragen:

- Was machte eine **gute Fahrt** aus? Was waren die entscheidenden Faktoren?
- Was konnte **schlecht laufen**? (Baustelle, Umleitungen, andere Radfahrer, Autofahrer, Ampelschaltung)
- Wie reagierten Sie bei **Störungen** (also Stau oder ähnliches): eher entspannt, eher genervt, weil...
- Aktivitäten bei Störungen/Problemen? (alternative Strecken, warten, ...)
- Wie nahmen Sie die **anderen Verkehrsteilnehmer** wahr: stören, gefährlich?
- Wie nahmen Sie Ihre Fahrradroute wahr? Sicher/unsicher, angenehm/ unangenehm zu fahren?
  - Wie wählten Sie die Strecke? (kürzeste, schönste, angenehmste)
- Wie **gerne** fuhren Sie mit dem Fahrrad zur Arbeit?
  - Was machte Spaß? Was war vielleicht belastend?
- Was für einen Fahrstil hatten Sie? (Fahren Sie lieber **schnell oder eher gemächlich**?)
- Wie waren Sie fürs Radfahren ausgerüstet? (was hatten sie dabei, Tasche, Kleidung etc.)
- Hat sich an Ihrem **Fahrstil/ Fahrverhalten** etwas geändert, seit Sie mit dem Fahrrad pendeln (sicherer, schneller, aufmerksamer, unaufmerksamer)?
- Gibt es für Sie als Pendler mit dem Fahrrad **ungeschriebene Regeln**, an die Sie sich halten bzw. von denen Sie möchten, dass andere sich auch daranhalten.

## Ankommen am Arbeitsplatz

Wenn Sie dann am **Zielort ankamen**, wie lief das ab? Wie kamen Sie vom Verkehrsmittel an den Arbeitsplatz?

→ **Frei erzählen lassen**

### → Ggf. nachfragen

- **Wenn mit dem Auto:** Stand ein Parkplatz zur Verfügung oder mussten Sie suchen?
  - Wie war das organisiert? Kosten etc.
- **Wenn mit dem ÖV:** Wie weit war Ihr Weg von der Haltestelle zum Arbeitsplatz?
  - Wie legten Sie die Strecke zurück? Wie empfanden Sie sie?
  - Erledigten Sie dabei noch etwas?
- **Wenn mit dem Rad:** Wo parkten Sie Ihr Fahrrad gewöhnlich? Wie bewerten Sie das?
- In **welcher Verfassung** kamen Sie am Arbeitsplatz an (z.B. verschwitzt, außer Atem, müde, aufgekratzt, entspannt, etc.)? Wovon hing das ab? Inwieweit hatte das mit dem Pendeln zu tun?

- Was hätten Sie sich nach Ihrer Ankunft gewünscht (mehr Ruhe, Pause vor dem Arbeitsbeginn)?
- **Was haben Sie als erstes gemacht**, als Sie angekommen sind? (Kaffee trinken, frühstücken, mit Kollegen reden, rauchen, Computer an, umziehen, etc.)

## Während des Pendelns – Rückweg

*Können Sie mir nun von Ihrem **Rückweg vor der Corona-Pandemie** erzählen? Was ist dabei **anders als auf dem Hinweg**?*

→ **Frei erzählen lassen**

→ **Ggf. nachfragen**

- Typische **Abfahrtszeit**?
  - Variierte die Abfahrt? Wenn ja, nach welchen Faktoren?
- **Verkehrssituation** während der Rückfahrt?
- **Gleicher Weg** nach Hause oder wurde variiert? Wenn ja, wovon hing das ab?
- Fuhren Sie auf dem Rückweg direkt nach Hause oder hatten Sie noch **Zwischenstationen** bzw. andere Aktivitäten? Wenn ja, welche, wie häufig?
  - *Hier genau nachfragen – wichtig auch, wenn nicht regelmäßig oder spontan*
- **Tätigkeiten** während des Pendelns (lesen, Musik hören, laut singen, gucken, schlafen, telefonieren, etc.)

## Nach Ankunft zu Hause

*Erzählen Sie bitte noch kurz, was Sie gleich **nach der Ankunft zu Hause** – vor der Corona-Pandemie gemacht haben?*

→ **Frei erzählen lassen**

## Wahrnehmung des Pendelns insgesamt

*Können Sie für mich noch einmal zusammenfassen, wie Sie Ihren **Pendelweg vor Corona insgesamt** für sich bewertet haben?*

→ **Frei erzählen lassen**

→ **Ggf. nachfragen**

- Wie empfanden Sie die Zeit, die Sie mit Pendeln verbracht haben (unnötig, stressig, produktiv, entspannend...)?
- Sind sie eher gern/ eher ungern gependelt?
- Was schätzten Sie an Ihrem Pendelweg?
- Was störte Sie?

## Teil 2: Praktik des Pendelns während Corona (15 min)

*Können Sie mir möglichst detailliert beschreiben, wie sich ihr Pendeln **durch die Corona-Pandemie verändert** hat?*

→ **Sofern nicht schon erwähnt. Erst frei erzählen lassen! Dann nachhaken**

## Häufigkeit des Pendelns

Zuerst interessiert mich, ob Sie seit der Pandemie – oder in den verschiedenen Phasen seitdem – **weniger Pendeln**?

→ **Frei erzählen lassen**

→ **Ggf. nachfragen**

- Wie oft wird noch gependelt?
- Wo und wie gearbeitet? Home-Office? Kurzarbeit?
  - Welche Möglichkeiten bietet der Arbeitgeber?
- Arbeitsplatz in Gefahr?
- Andere Arbeit?
- Wie sind die Erfahrungen mit dem reduzierten Pendeln?
  - Wie ist es weniger/ gar nicht mehr zu Pendeln?
  - Was sind die Vor- und Nachteile?
- Wie wird die „gewonnene“ Zeit genutzt?

## Pendelweg während Corona

Können Sie mir jetzt erzählen, was sich an Ihrem Pendelweg während Corona verändert hat?

→ **Frei erzählen lassen**

→ **Ggf. nachfragen**

- Nutzen Sie andere Verkehrsmittelwahl? Falls ja, warum?
- Wie hat sich die Verkehrssituation verändert?
  - Bei ÖV-Pendlern: Wie hat sich die Atmosphäre im ÖV verändert?
- Wie nehmen Sie das Pendeln jetzt wahr (angenehmer / unangenehmer, stressiger/entspannter)?
- Inwieweit haben sich die Aktivitäten verändert, die Sie während des Pendelns machen?
- Wie haben sich Zwischenstationen auf dem Hin- oder Rückweg verändert?
  - Was ist weggefallen? Was dazukommen?
  - Ist das angenehm oder nicht? Warum?

## Veränderte Alltagsorganisation

Wie hat sich die veränderte Pendelsituation auf die Organisation Ihres Alltags ausgewirkt?

→ **Frei erzählen lassen**

→ **Ggf. nachfragen**

- Wie **bewerten Sie die neue Situation** insgesamt: Was könnte für die Zukunft davon übernommen werden?
  - Was sollte auf keinen Fall übernommen werden?

→ **Bei Mehrpersonenhaushalten:**

*Wenn Sie mit mehreren Personen im Haushalt leben, wie geht es den anderen Haushaltsmitgliedern mit der veränderten Situation?*

- Welche Form der Absprachen gab es mit ihrem\*ihrer Partner\*in?
- Wie haben Ihre Kinder auf die veränderte Situation reagiert?
- Wie sind Sie mit der Überschneidung der Arbeitsrolle und zu-Hause-Rolle umgegangen?

## Teil 3: Pendelbiografie – Routinenbeginn und Normalitätsverständnis (15 Min)

### Routinenbeginn

*Kommen wir jetzt zur **Geschichte ihres Pendelns**: Wie lange arbeiten Sie schon bei Ihrem aktuellen Arbeitgeber? Seit wann studieren Sie/ machen Sie eine Ausbildung?*

*Wie war das damals? Wie kam die Entscheidung zum Pendeln zu Stande?*

→ **Frei erzählen lassen**

→ **Ggf. nachfragen**

- Was waren für Sie die **Gründe**? (Spontanantwort abwarten und mit mehreren Fragen durchexplorieren)
- Wie lange wohnen Sie schon in xy?
- Inwiefern hat der Weg zur Arbeit bei der Wahl Ihres Wohnorts eine Rolle gespielt?
- Wussten Sie gleich, dass Sie die Strecke mit dem x (Verkehrsmittel) pendeln werden oder gab es verschiedene Möglichkeiten?
- Inwiefern hat die Verfügbarkeit von oder die Erreichbarkeit zu einem Verkehrsmittel bei der Wahl ihres Wohnortes eine Rolle gespielt?

→ **Bei Mehrpersonenhaushalten:**

- Haben Sie Ihre Entscheidung zu Pendeln **gemeinsam** mit den anderen Haushaltsmitgliedern getroffen?
  - Was waren die Interessen der anderen HH-MG? Was haben die anderen im Haushalt dazu gesagt?

### Regelungen am Arbeitsplatz

*Wie war das bei Ihrem Arbeitgeber vor Corona: Welche Arbeitszeiten und Anwesenheitsregelungen hatten Sie?*

- Voll- oder Teilzeit, Schicht, Beginn und Feierabend, Gleitzeit, Vertrauensarbeitszeit, Zeiterfassung usw.
- Wie häufig waren Sie in der Uni/ in der Berufsschule? Wie oft in der Woche und zu welchen Uhrzeiten?



- Für Azubis und Studierende: Gab es Möglichkeiten für Flexibilisierung der Ausbildungszeit? Präsenz-/Online-Teilnahme, Nicht hingehen, Aufzeichnung
- Hat sich hier durch die Corona-Pandemie etwas verändert?

## Thema Pendeln am Arbeits- & Ausbildungsplatz

*Können Sie mir Situationen schildern, bei denen Mobilität bzw. Pendeln ein Thema bei Ihrer Arbeit ist?*

→ **Frei erzählen lassen**

→ **Ggf. nachfragen**

- Gibt es bestimmte geförderte Mobilitätsangebote beim/ vom Arbeitgeber/ vom Ausbildungsort?
  - Job-Ticket, JobRad, Dienstwagen, Mitfahrbörse, Shuttles, Bikesharing u.ä.
  - Gibt es noch andere Angebote (bzgl. Parken/ Mitfahren/Fahrradabstellen, Umkleide/ Duschen, Serviceangebote für Radfahrende etc.)
- Welche dieser Angebote nutzen Sie bzw. würden Sie gerne nutzen?
- Wie wird Pendeln (mit einem bestimmten Verkehrsmittel) unter den Kolleg\*innen diskutiert?

## Thema Pendeln im Haushalt

→ **Bei Mehrpersonenhaushalten:**

*Wie ist das bei Ihnen im Haushalt: Sind Sie die einzige Person im Haushalt, die pendelt oder **pendelt auch der Partner/ die Partnerin**?*

- Was machen denn die anderen Haushaltsmitglieder beruflich?
- Stellen Sie die anderen Haushaltsmitglieder bitte kurz vor
  - Geschlecht, Alter

→ **Bei Mehrpersonenhaushalten:**

*Können Sie mir bitte etwas darüber erzählen, wie die Verantwortlichkeiten im Haushalt aufgeteilt sind?*

→ **Frei erzählen lassen**

→ **Ggf. nachfragen**

- Wer ist für **Einkäufe zuständig**? Wann werden die gemacht (werktags oder Wochenende)?
- Wie sind **regelmäßige Hausarbeiten** im Haushalt verteilt und organisiert? (Wäsche, Kochen, Putzen, etc.)
  - Wann finden sie statt?

→ **An alle mit Kindern im HH:**

- Wie wird die Kinderbetreuung aufgeteilt?

*Wie sind die Orte für Einkäufe zu **erreichen**?*

- Wie weit sind die Orte entfernt?
- Mit welchem Verkehrsmittel sind sie zu erreichen

→ **An alle mit Kindern im HH:**

- Wie **erreichen** Sie die Kita/ die Schule?

## Pendelwahrnehmung im Haushalt & Freundeskreis

→ Bei Singlehaushalten nur Abfrage des Freundeskreises

Ist Pendeln in Ihrem Haushalt/ im Freundeskreis ein Thema? Sprechen Sie darüber?

→ **Frei erzählen lassen**

→ **Ggf. nachfragen**

- Wie empfinden es die anderen Haushaltsmitglieder/ die Freunde, dass Sie pendeln?
- Sprechen Sie mit Ihren Freunden über das Pendeln?
- Ist Pendeln (mit einem bestimmten Verkehrsmittel) eher ein positives oder negatives Thema im Haushalt/ im Freundeskreis?

## Teil 4: Alternativszenarien (5 min)

Jetzt würde ich gerne noch mit Ihnen über Ihr **zukünftiges Pendeln** sprechen. Stellen Sie sich vor, wir sind im Jahr **2030**. **Was wünschen Sie sich für Ihr Pendeln bis dahin?** Sind Sie umgestiegen auf ein anderes Verkehrsmittel? Pendeln Sie weniger, kürzer oder gar nicht mehr? Wie geht es Ihnen dann beim Pendeln?

→ **Frei erzählen lassen**

→ **Ggf. nachfragen**

- Was würde sich dann in Ihrem Alltag ändern? Wie sähe Ihr Tag dann aus?
- Wie fänden Sie das?

## Teil 5: Mobilitätsausstattung, -orientierungen und Freizeit (5 min)

Wir haben jetzt viel über Ihren Arbeitsweg gehört. Welche Wege machen Sie denn in Ihrer **Freizeit**?

- Mit welchem Verkehrsmittel tätigen Sie Ihre Freizeitwege?
- Bei Kindern im Haushalt: Wie kommen die Kinder zu ihren Freizeitaktivitäten?

Bevor wir zum Ende kommen, würde ich Sie noch bitten, mir etwas über die vorhandenen bzw. zugänglichen **Verkehrsmittel in Ihrem Haushalt** zu erzählen. Sie haben eben gesagt, sie fahren mit dem x zur Arbeit. Welche anderen Verkehrsmittel gibt es im Haushalt?

- Auto/s: wie viele? Jeweils:
  - Privatwagen oder Dienstwagen?
  - Wer nutzt das/die Autos?
  - Wofür wird das Auto/ die Autos im Haushalt genutzt? Wofür ist es wichtig?
  - Welche Rolle spielt das Auto in Ihrem Haushalt?
  - Könnten Sie sich vorstellen, ohne Auto zu leben? Wenn ja, unter welchen Bedingungen? Wenn nein, aus welchen Gründen nicht?
- Falls kein Auto im HH: Warum haben Sie kein Auto?
- Fahrräder im Haushalt: Anzahl
  - Welche Wege/ Erledigungen werden mit dem Fahrrad gemacht?

- Welche Rolle spielt das Fahrrad für Sie? Für die anderen im Haushalt?
- Verfügbarkeit ÖPNV-Zeitkarten, Bahncards etc.
- Welche Rolle spielt der ÖV für Sie, für die anderen HH-Mitglieder?
  - Nutzungshäufigkeit (persönlich, die anderen HH-Mitglieder)
  - Wofür wird der ÖV genutzt?
  - Erreichbarkeit ÖPNV: Wie weit ist die nächste Haltestelle/ der Bahnhof entfernt?

## Ende

Bedanken und Nachfrage an **Autofahrer\*innen**:

*Am Schluss hätte ich noch eine Frage an Sie: Wir haben vor, in einem zweiten Gespräch noch weiter über Ihr Pendeln zu sprechen und haben dazu eine kleine interaktive Aufgabe vorbereitet.*

*Diese wird ausschließlich online stattfinden und ebenfalls ca. 60 Minuten dauern.*

*Hätten Sie Lust, mit uns in einem weiteren Gespräch im September noch einmal über Ihre Pendelerfahrungen zu sprechen?*

## Quota plan “Commuting Practices”

**Topic of the interviews:** Commuting in the Frankfurt RhineMain region

**Timeframe of the interviews:** Beginning of June to mid-July

**Number of interviews:** 45

**Duration of interviews:** 1 hour

Conducted by telephone or online with the video-conference tool BigBlueButton

Interviews with people from the Frankfurt RhineMain region (see map for area)

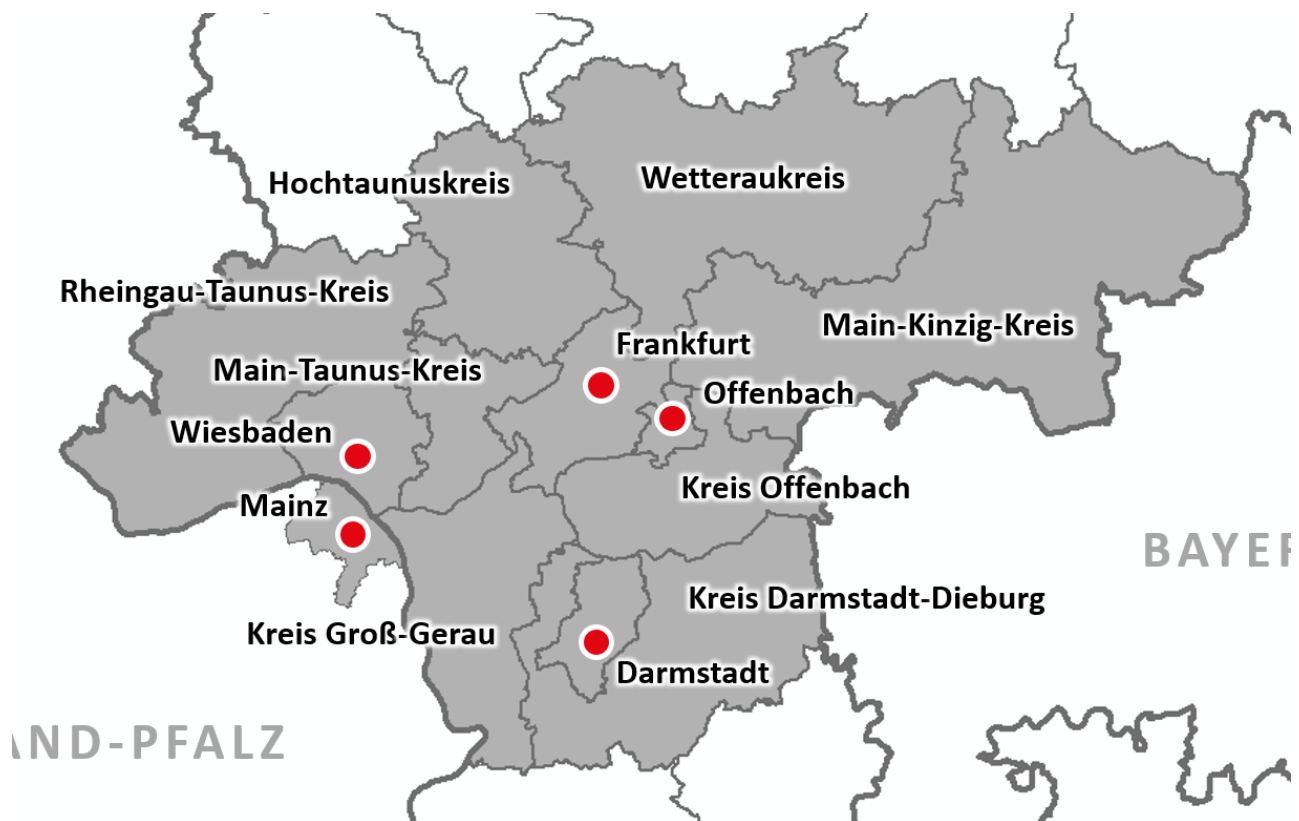

All of them are commuters: people who live at least 3 km from their place of work and commute at least 3 times a week. This includes those who no longer commute regularly since the Covid-19 pandemic, but did until the pandemic.

All of them live in the Frankfurt RhineMain region (grey area in map). The place of work should be located in or in the direction of Frankfurt am Main. Respondents should come from different directions of the region. The place of residence should be recorded during recruitment.

- **Men/women:** 50% each
- **Commuting constellation in the household:**
  - o One commuter per household: max. 70%
  - o 2 or more commuters per household: min. 30%
- **Commuting distance:**
  - o 3 to 7 km: 10%
  - o 8 to 15 km: 20%
  - o 16 to 40 km: 60%

- 40+ km: 10%
- **Main mode of transport of commuting:**
  - car: 60%
  - combiner (combining car and public transport or bicycle and public transport): 10%
  - public transport: 20%
  - bicycle: 10%
- **Mobility equipment:**
  - No car in the household: 10%
  - One car in the household: 60%
  - 2 or more cars in the household: 30%
- **Age: 18-55 years:**
  - 18 to 30 years: 20%
  - 31 to 45 years: 60%
  - 46 to 55 years: 20%
- **Household constellations:**
  - Singles: 16%
  - Couples without children: 20%
  - Couples with one or more children up to 14: 36%
  - Single parents with one or more children: 16%
  - Others, including persons living in shared apartments, with older children in the household or with their parents: 12%
- **Working constellations**
  - employees: 75%
  - trainees: 15%
  - university students: 10%
  - (Not represented: unemployed persons, pupils, retired persons)
  - Type of employment:
    - Part time: 35%
    - Full time: 65%
- **Education:**
  - Without graduation/ or German "Hauptschulabschluss": 20%
  - Secondary education/ German "Mittlere Reife": 20%
  - High school graduation/ German Abitur: 20%
  - Completed university degree: 40%
- A total of about 20% from low-income households
- With migration background: 30-40%
